# Supplementary material for: APOE-ε4 Carrier Status and Gut Microbiota Dysbiosis in Patients With Alzheimer Disease
Source: Front Neurosci. 2021 Feb 24;15:619051. doi: 10.3389/fnins.2021.619051 (PMC7959830; doi:10.3389/fnins.2021.619051)
Supplement: Supplementary file 4 [file Table_2.XLSX]

## Sheet: Original data
NUMBER	gender	age	AD	rs3851179	rs11771145	rs3818361	rs6656401	rs3865444	rs376450	rs9331888	rs744373	rs670139	rs9349407	rs429358apoe	rs7412apoe	APOEgenotype
1	1	71	1	2	2	1	1	1	2	3	1	2	1	1	1	7
2	1	71	1	1	2	1	1	1	2	2	2	1	1	2	1	8
3	1	78	1	2	3	2	1	1	1	3	2	2	1	1	1	7
4	2	72	1	2	2	2	1	2	1	3	2	2	2	2	1	8
5	2	70	1	1	2	2	1	1	1	2	1	1	1	2	1	8
6	2	47	1	2	3	2	2	1	1	2	#NULL!	1	1	1	1	7
7	1	66	1	1	2	3	2	1	2	2	1	2	1	1	1	7
8	2	73	1	2	2	3	2	2	2	1	2	2	1	1	1	7
9	2	70	1	3	1	3	2	1	2	1	2	1	1	2	1	8
10	1	75	1	1	2	2	1	1	2	2	2	1	2	2	1	8
13	2	67	1	3	1	3	2	1	1	2	2	2	1	1	1	7
14	2	78	1	1	1	2	1	3	2	2	2	3	2	1	1	7
15	1	70	1	2	1	3	1	1	2	2	2	3	1	1	1	7
16	1	72	1	2	1	1	2	2	2	2	1	2	1	1	1	7
17	1	75	1	2	3	2	2	1	1	2	2	2	1	1	1	7
19	1	69	1	3	2	2	2	1	1	2	1	2	1	2	1	8
20	1	73	1	3	2	2	2	1	1	2	2	2	1	1	2	6
21	2	64	1	2	1	1	1	1	2	3	1	1	1	1	1	7
28	2	70	1	1	2	2	1	2	2	2	2	2	1	2	1	8
29	1	68	1	1	2	3	1	1	1	3	2	1	2	1	1	7
30	2	67	1	2	1	2	1	1	1	3	2	3	1	1	2	6
31	1	78	1	2	2	2	2	1	1	3	1	2	1	2	1	8
32	2	71	1	2	2	1	1	1	1	3	2	2	1	1	1	7
33	2	81	1	2	2	1	1	1	1	1	2	1	1	2	1	8
34	1	78	1	1	2	2	1	2	1	1	3	1	1	1	1	7
35	2	86	1	2	2	2	2	1	1	2	2	1	1	1	1	7
36	1	74	1	2	2	1	1	1	2	1	2	1	1	1	1	7
37	1	75	1	1	2	1	1	1	2	2	2	1	2	3	1	9
38	1	67	1	2	1	1	1	1	2	2	2	2	1	1	2	6
39	1	80	1	2	2	2	1	1	2	1	1	1	1	1	1	7
18	2	75	3	2	2	1	2	2	2	3	2	1	1	1	1	7
24	1	83	3	3	3	1	2	2	1	2	2	3	1	1	2	6
25	2	74	3	1	3	2	1	1	1	3	1	2	1	#NULL!	#NULL!	0
40	1	71	3	1	1	2	1	2	1	3	2	2	1	1	1	7
41	1	77	3	3	3	1	2	1	2	2	1	2	1	1	1	7
42	1	77	3	2	1	1	1	1	2	3	1	1	1	1	1	7
43	2	70	3	2	2	1	1	1	1	2	3	2	1	1	1	7
44	2	73	3	1	2	2	1	2	1	1	2	1	1	1	1	7
48	1	71	3	1	2	2	2	2	2	3	2	2	1	2	1	8
49	1	78	3	2	1	2	2	1	1	3	1	1	1	1	2	6
51	2	70	3	2	1	2	2	1	2	1	2	3	1	1	1	7
52	2	47	3	2	3	1	2	2	1	3	1	2	2	1	2	6
56	1	71	3	2	2	2	2	3	2	2	2	1	2	1	1	7
61	2	76	3	1	2	2	1	2	1	3	2	2	1	1	2	6
62	2	79	3	2	1	1	2	2	1	3	1	1	1	#NULL!	#NULL!	0
63	2	63	3	2	2	2	2	1	1	1	2	2	1	1	1	7
64	2	69	3	2	1	1	2	2	2	3	1	1	1	1	1	7
65	1	73	3	2	1	2	2	1	1	2	1	3	2	1	1	7
66	2	75	3	2	1	1	2	1	2	2	2	1	2	1	1	7
67	2	78	3	1	3	3	2	2	1	1	2	2	1	1	1	7
68	2	65	3	1	1	1	2	1	1	3	2	3	1	1	2	6
69	2	76	3	3	2	1	1	1	2	1	1	2	1	1	1	7
72	1	75	3	2	2	1	1	2	2	1	2	2	1	1	1	7
74	2	67	3	2	1	1	1	1	2	1	1	3	1	1	1	7
79	1	76	3	2	3	3	1	1	2	2	1	2	1	1	1	7
86	2	74	3	1	1	2	2	2	1	2	2	2	1	2	1	8
88	1	70	3	1	2	2	2	1	1	3	2	3	2	1	1	7
90	1	75	3	1	2	1	2	1	1	3	2	2	1	1	1	7
91	2	75	3	2	3	2	2	2	2	3	1	2	1	1	1	7
92	1	75	3	3	1	1	2	1	1	2	3	2	1	1	1	7
93	1	77	3	2	2	2	2	1	2	2	1	3	1	1	1	7
94	1	69	3	2	2	1	2	1	1	3	2	3	1	1	1	7
99	2	76	3	1	2	2	2	1	3	2	1	3	1	1	1	7
100	2	68	3	3	1	2	2	1	2	3	1	2	1	2	1	8
101	2	73	3	2	2	2	1	1	1	2	2	2	1	1	1	7
105	2	67	3	1	1	1	2	2	2	2	3	2	1	1	2	6
106	1	69	3	1	2	2	2	1	#NULL!	3	1	2	2	1	1	7
107	1	65	3	2	1	2	1	1	1	3	1	3	1	1	1	7
108	1	73	3	2	2	2	1	1	2	2	3	2	1	1	1	7
109	1	69	3	2	2	3	1	1	#NULL!	1	2	3	1	1	1	7
110	1	73	3	2	1	3	1	1	1	3	1	3	1	2	1	8
111	1	64	3	2	2	3	1	1	2	1	1	3	1	1	1	7
113	2	54	3	3	2	1	1	1	2	1	1	1	1	1	2	6
116	2	73	3	2	1	1	2	1	1	3	1	1	1	2	1	8
120	1	53	3	2	3	3	2	1	2	2	1	1	2	1	2	6
124	2	71	3	2	1	3	1	2	1	2	2	3	1	1	1	7
125	2	71	3	3	1	1	2	1	2	2	1	3	1	1	1	7
