# Supplementary material for: APOE-ε4 Carrier Status and Gut Microbiota Dysbiosis in Patients With Alzheimer Disease
Source: Front Neurosci. 2021 Feb 24;15:619051. doi: 10.3389/fnins.2021.619051 (PMC7959830; doi:10.3389/fnins.2021.619051)
Supplement: Supplementary file 6 [file Table_4.XLSX]

## Sheet: Sheet2
#OTU ID	group	d__Bacteria;k__norank;p__Actinobacteria	d__Bacteria;k__norank;p__Bacteroidetes	d__Bacteria;k__norank;p__Cyanobacteria	d__Bacteria;k__norank;p__Firmicutes	d__Bacteria;k__norank;p__Fusobacteria	d__Bacteria;k__norank;p__Proteobacteria	d__Bacteria;k__norank;p__Saccharibacteria	d__Bacteria;k__norank;p__Synergistetes	d__Bacteria;k__norank;p__Tenericutes	d__Bacteria;k__norank;p__Verrucomicrobia	d__Bacteria;k__norank;p__unclassified_k__norank	d__Bacteria;k__norank;p__Actinobacteria;c__Actinobacteria	d__Bacteria;k__norank;p__Bacteroidetes;c__Bacteroidia	d__Bacteria;k__norank;p__Bacteroidetes;c__Cytophagia	d__Bacteria;k__norank;p__Bacteroidetes;c__Flavobacteriia	d__Bacteria;k__norank;p__Cyanobacteria;c__Cyanobacteria	d__Bacteria;k__norank;p__Firmicutes;c__Bacilli	d__Bacteria;k__norank;p__Firmicutes;c__Clostridia	d__Bacteria;k__norank;p__Firmicutes;c__Erysipelotrichia	d__Bacteria;k__norank;p__Firmicutes;c__Negativicutes	d__Bacteria;k__norank;p__Firmicutes;c__unclassified_p__Firmicutes	d__Bacteria;k__norank;p__Fusobacteria;c__Fusobacteriia	d__Bacteria;k__norank;p__Proteobacteria;c__Alphaproteobacteria	d__Bacteria;k__norank;p__Proteobacteria;c__Betaproteobacteria	d__Bacteria;k__norank;p__Proteobacteria;c__Deltaproteobacteria	d__Bacteria;k__norank;p__Proteobacteria;c__Epsilonproteobacteria	d__Bacteria;k__norank;p__Proteobacteria;c__Gammaproteobacteria	d__Bacteria;k__norank;p__Saccharibacteria;c__norank_p__Saccharibacteria	d__Bacteria;k__norank;p__Synergistetes;c__Synergistia	d__Bacteria;k__norank;p__Tenericutes;c__Mollicutes	d__Bacteria;k__norank;p__Verrucomicrobia;c__Verrucomicrobiae	d__Bacteria;k__norank;p__unclassified_k__norank;c__unclassified_k__norank	d__Bacteria;k__norank;p__Actinobacteria;c__Actinobacteria;o__Actinomycetales	d__Bacteria;k__norank;p__Actinobacteria;c__Actinobacteria;o__Bifidobacteriales	d__Bacteria;k__norank;p__Actinobacteria;c__Actinobacteria;o__Coriobacteriales	d__Bacteria;k__norank;p__Actinobacteria;c__Actinobacteria;o__Corynebacteriales	d__Bacteria;k__norank;p__Actinobacteria;c__Actinobacteria;o__Micrococcales	d__Bacteria;k__norank;p__Actinobacteria;c__Actinobacteria;o__Propionibacteriales	d__Bacteria;k__norank;p__Bacteroidetes;c__Bacteroidia;o__Bacteroidales	d__Bacteria;k__norank;p__Bacteroidetes;c__Cytophagia;o__Cytophagales	d__Bacteria;k__norank;p__Bacteroidetes;c__Flavobacteriia;o__Flavobacteriales	d__Bacteria;k__norank;p__Cyanobacteria;c__Cyanobacteria;o__Gastranaerophilales	d__Bacteria;k__norank;p__Cyanobacteria;c__Cyanobacteria;o__norank_c__Cyanobacteria	d__Bacteria;k__norank;p__Firmicutes;c__Bacilli;o__Bacillales	d__Bacteria;k__norank;p__Firmicutes;c__Bacilli;o__Lactobacillales	d__Bacteria;k__norank;p__Firmicutes;c__Clostridia;o__Clostridiales	d__Bacteria;k__norank;p__Firmicutes;c__Erysipelotrichia;o__Erysipelotrichales	d__Bacteria;k__norank;p__Firmicutes;c__Negativicutes;o__Selenomonadales
1	C	0.0470956	0.254942	0	0.298363	0.00218626	0.390581	0.00683205	0	0	0	0	0.0470956	0.254942	0	0	0	0.014818	0.234962	0.0412352	0.00734825	0	0.00218626	0	6.07294e-05	0.00285428	0	0.387666	0.00683205	0	0	0	0	0.00091094	0.0328546	0.011326	0.000182188	0.00182188	0	0.254942	0	0	0	0	0.00100203	0.0138159	0.234962	0.0412352	0.00734825
2	C	0.00414938	0.298007	0.000361864	0.654733	0	0.0423381	9.64972e-05	7.23729e-05	0.000192994	0	4.82486e-05	0.00414938	0.298007	0	0	0.000361864	0.00188169	0.57604	0.00180932	0.0750024	0	0	0.000144746	0.00320853	0.00236418	0	0.0366207	9.64972e-05	7.23729e-05	0.000192994	0	4.82486e-05	2.41243e-05	4.82486e-05	0.004077	0	0	0	0.298007	0	0	0	0.000361864	2.41243e-05	0.00185757	0.57604	0.00180932	0.0750024
3	C	0.00509985	0.395567	2.52468e-05	0.59638	0	0.00292863	0	0	0	0	0	0.00509985	0.395567	0	0	2.52468e-05	0.000833144	0.575576	0.00282764	0.0171426	0	0	0	0.000555429	0.00154005	0	0.000833144	0	0	0	0	0	5.04936e-05	0.00439294	0.000656416	0	0	0	0.395567	0	0	0	2.52468e-05	0	0.000833144	0.575576	0.00282764	0.0171426
4	C	0.00121046	0.171312	8.17875e-05	0.791507	3.2715e-05	0.0335002	0.00032715	0	0.00202833	0	0	0.00121046	0.171296	0	1.63575e-05	8.17875e-05	0.00134132	0.744398	0.00811332	0.037655	0	3.2715e-05	1.63575e-05	1.63575e-05	0.000212648	0	0.0332548	0.00032715	0	0.00202833	0	0	0	0.000605228	0.000605228	0	0	0	0.171296	0	1.63575e-05	0	8.17875e-05	3.2715e-05	0.0013086	0.744398	0.00811332	0.037655
5	C	0.1866	0.0716108	0	0.725074	0	0.0163233	0.000372768	1.96194e-05	0	0	0	0.1866	0.0716108	0	0	0	5.88582e-05	0.661134	0.00276633	0.0611144	0	0	0	0.000804395	0.00431626	0	0.0112027	0.000372768	1.96194e-05	0	0	0	7.84775e-05	0.172376	0.014126	1.96194e-05	0	0	0.0716108	0	0	0	0	0	5.88582e-05	0.661134	0.00276633	0.0611144
6	C	0.00537188	0.317365	0	0.648177	0.000936545	0.0224947	0.000742167	0	0	0.0048771	3.53413e-05	0.00537188	0.317365	0	0	0	0.00243855	0.550529	0.0258168	0.0693927	0	0.000936545	0	0.000512449	0.000353413	0	0.0216289	0.000742167	0	0	0.0048771	3.53413e-05	8.83533e-05	5.3012e-05	0.00523051	0	0	0	0.317365	0	0	0	0	7.06826e-05	0.00236787	0.550529	0.0258168	0.0693927
7	C	0.139444	0.207926	5.70207e-05	0.635638	0	0.00658589	0.000142552	0	0.00980756	0.000399145	0	0.139444	0.207926	0	0	5.70207e-05	0.0052459	0.534911	0.0120029	0.0834783	0	0	0	0.000427655	0.00122594	0	0.00493229	0.000142552	0	0.00980756	0.000399145	0	8.5531e-05	0.126757	0.012516	0	8.5531e-05	0	0.207926	0	0	0	5.70207e-05	5.70207e-05	0.00518888	0.534911	0.0120029	0.0834783
8	C	0.0759654	0.052329	0	0.707444	7.15529e-05	0.0261645	2.3851e-05	0.000262361	0	0.137739	0	0.0759654	0.052329	0	0	0	0.190736	0.492785	0.000954039	0.0229685	0	7.15529e-05	0	0.00601045	0.00403082	0	0.0161233	2.3851e-05	0.000262361	0	0.137739	0	0.000787082	0.0722923	0.00255205	0.000214659	0.000119255	0	0.052329	0	0	0	0	4.7702e-05	0.190689	0.492785	0.000954039	0.0229685
9	C	0.0812862	0.280538	7.79849e-05	0.612545	7.79849e-05	0.00847436	0.00015597	0	0.000181965	0.0166368	2.5995e-05	0.0812862	0.280538	0	0	7.79849e-05	0.0144272	0.583145	0.00179365	0.0131794	0	7.79849e-05	5.19899e-05	0.0010138	0.00145572	0	0.00595285	0.00015597	0	0.000181965	0.0166368	2.5995e-05	0.000129975	0.0535236	0.0275806	2.5995e-05	2.5995e-05	0	0.280538	0	0	0	7.79849e-05	5.19899e-05	0.0143752	0.583145	0.00179365	0.0131794
10	C	0.0565308	0.0763284	8.85139e-05	0.721299	0.000354055	0.0350515	0.000206532	0.000501578	0	0.10961	2.95046e-05	0.0565308	0.0763284	0	0	8.85139e-05	0.206798	0.503909	0.000649102	0.00994306	0	0.000354055	0	0.00734665	0.00525182	2.95046e-05	0.0224235	0.000206532	0.000501578	0	0.10961	2.95046e-05	0.000354055	0.0532853	0.0025669	8.85139e-05	0.000236037	0	0.0763284	0	0	0	8.85139e-05	0	0.206798	0.503909	0.000649102	0.00994306
11	C	0.0822711	0.166327	0	0.737927	3.64193e-05	0.00721101	0.000327773	0	0.000182096	0.00571782	0	0.0822711	0.166327	0	0	0	0.0118363	0.708901	0.00426105	0.0129288	0	3.64193e-05	0	0.00116542	0.00142035	0	0.00462525	0.000327773	0	0.000182096	0.00571782	0	0.000400612	0.0717459	0.0100881	3.64193e-05	0	0	0.166327	0	0	0	0	3.64193e-05	0.0117998	0.708901	0.00426105	0.0129288
12	C	0.0200971	0.00493565	0.000190881	0.855421	2.72688e-05	0.11731	0.00196335	0	5.45375e-05	0	0	0.0200971	0.00488111	5.45375e-05	0	0.000190881	0.152132	0.621073	0.0665085	0.0155977	0.000109075	2.72688e-05	0	8.18063e-05	0.000163613	0	0.117065	0.00196335	0	5.45375e-05	0	0	0.00103621	0.00021815	0.0137707	0.000163613	0.00488111	2.72688e-05	0.00488111	5.45375e-05	0	0	0.000190881	0.000954407	0.151178	0.621073	0.0665085	0.0155977
13	C	0.0343769	0.00813951	0	0.803424	2.27361e-05	0.151445	0.00259191	0	0	0	0	0.0343769	0.00793488	0.000204625	0	0	0.150149	0.587136	0.0530205	0.0130732	4.54721e-05	2.27361e-05	0	0.000136416	0.000818498	0	0.15049	0.00259191	0	0	0	0	0.00118227	2.27361e-05	0.0280336	0.000136416	0.00500193	0	0.00793488	0.000204625	0	0	0	0.00111407	0.149035	0.587136	0.0530205	0.0130732
14	C	0.0768213	0.0666196	2.93997e-05	0.69392	0.000264597	0.0241959	0.000146998	0.000205798	0	0.137796	0	0.0768213	0.0666196	0	0	2.93997e-05	0.210384	0.474893	0.000558594	0.00808491	0	0.000264597	0	0.00438055	0.00258717	0	0.0172282	0.000146998	0.000205798	0	0.137796	0	0.000646792	0.072235	0.00367496	5.87993e-05	0.000205798	0	0.0666196	0	0	0	2.93997e-05	2.93997e-05	0.210355	0.474893	0.000558594	0.00808491
15	C	0.0417713	0.0223929	2.3924e-05	0.738152	2.3924e-05	0.194263	0.00334936	0	0	2.3924e-05	0	0.0417713	0.0222015	0.000191392	0	2.3924e-05	0.140817	0.526137	0.0622024	0.00899543	0	2.3924e-05	0	0.000287088	0.000885189	0	0.193091	0.00334936	0	0	2.3924e-05	0	0.00150721	0.00035886	0.0358621	0.000191392	0.00375607	9.56961e-05	0.0222015	0.000191392	0	0	2.3924e-05	0.00126797	0.139549	0.526137	0.0622024	0.00899543
16	C	0.00297526	0.180641	2.23704e-05	0.807615	0	0.00700192	8.94815e-05	0	0.000357926	0.00129748	0	0.00297526	0.180641	0	0	2.23704e-05	4.47407e-05	0.770771	0.0137354	0.0230638	0	0	0	0.00212518	0.00337792	0	0.00149881	8.94815e-05	0	0.000357926	0.00129748	0	0	0.00114089	0.00183437	0	0	0	0.180641	0	0	0	2.23704e-05	0	4.47407e-05	0.770771	0.0137354	0.0230638
17	C	0.455558	0.0231784	2.94516e-05	0.355982	2.94516e-05	0.162573	0.00265064	0	0	0	0	0.455558	0.0231784	0	0	2.94516e-05	0.00753961	0.305266	0.0111916	0.0319844	0	2.94516e-05	0	0.000500677	0.00170819	0	0.160364	0.00265064	0	0	0	0	0.000206161	0.439389	0.0159333	2.94516e-05	0	0	0.0231784	0	0	0	2.94516e-05	0.00017671	0.0073629	0.305266	0.0111916	0.0319844
18	C	0.0266468	0.343459	0.000999561	0.567019	0.000195036	0.0614608	0.000195036	0	0	2.43795e-05	0	0.0266468	0.343459	0	0	0.000999561	0.0412258	0.400897	0.0218197	0.103052	2.43795e-05	0.000195036	0	0.000487591	0.000877663	2.43795e-05	0.0600712	0.000195036	0	0	2.43795e-05	0	0.000877663	0.00702131	0.0186747	0	7.31386e-05	0	0.343459	0	0	0	0.000999561	2.43795e-05	0.0412014	0.400897	0.0218197	0.103052
19	C	0.000486771	0.0873898	5.72672e-05	0.746822	0	0.164242	0.000944909	0	2.86336e-05	2.86336e-05	0	0.000486771	0.0873898	0	0	5.72672e-05	0.000887642	0.123182	0.000544038	0.622208	0	0	0	0.00040087	0	0	0.163841	0.000944909	0	2.86336e-05	2.86336e-05	0	0.00031497	2.86336e-05	0.000143168	0	0	0	0.0873898	0	0	0	5.72672e-05	0	0.000887642	0.123182	0.000544038	0.622208
20	C	0.00510939	0.135028	4.367e-05	0.844622	0	0.0136032	0.00013101	2.1835e-05	0.00026202	0.00117909	0	0.00510939	0.135028	0	0	4.367e-05	0.00150662	0.813922	0.00652867	0.0226647	0	0	0	0.00189965	0.00834098	0	0.00336259	0.00013101	2.1835e-05	0.00026202	0.00117909	0	6.5505e-05	0.000371195	0.00467269	0	0	0	0.135028	0	0	0	4.367e-05	4.367e-05	0.00146295	0.813922	0.00652867	0.0226647
21	C	0.00211317	0.368255	2.34797e-05	0.374196	9.39188e-05	0.235736	4.69594e-05	0	0.00192533	0.0175863	2.34797e-05	0.00211317	0.368255	0	0	2.34797e-05	0.00176098	0.359873	0.000610472	0.0119512	0	9.39188e-05	0	0.000680911	0.00307584	0	0.231979	4.69594e-05	0	0.00192533	0.0175863	2.34797e-05	0	0.000140878	0.00197229	0	0	0	0.368255	0	0	0	2.34797e-05	0	0.00176098	0.359873	0.000610472	0.0119512
22	C	0.00719823	0.100886	2.21484e-05	0.85165	0	0.0386047	0.00152824	0	0.000110742	0	0	0.00719823	0.100886	0	0	2.21484e-05	0.0388261	0.784806	0.0158804	0.0120266	0.000110742	0	0	0.00456257	0.00582503	0	0.0282171	0.00152824	0	0.000110742	0	0	0.00055371	0.000332226	0.00593577	0	0.000376523	0	0.100886	0	0	0	2.21484e-05	8.85936e-05	0.0387375	0.784806	0.0158804	0.0120266
23	C	0.0633008	0.283854	0	0.612118	0	0.0256255	0.000499882	0	0.0142598	0	0.000342024	0.0633008	0.283854	0	0	0	0.00865584	0.581389	0.0127075	0.0093662	0	0	2.63096e-05	0.00260465	0.0198637	0	0.00313084	0.000499882	0	0.0142598	0	0.000342024	0.000210476	5.26191e-05	0.0628535	7.89287e-05	0.000105238	0	0.283854	0	0	0	0	0.000105238	0.00855061	0.581389	0.0127075	0.0093662
24	C	0.00214687	0.752689	9.33424e-05	0.241127	0	0.00389704	4.66712e-05	0	0	0	0	0.00214687	0.752689	0	0	9.33424e-05	0.0020302	0.192215	0.00184351	0.0450377	0	0	0	0.000326698	0	0	0.00357035	4.66712e-05	0	0	0	0	2.33356e-05	0.00021002	0.00186685	0	4.66712e-05	0	0.752689	0	0	0	9.33424e-05	2.33356e-05	0.00200686	0.192215	0.00184351	0.0450377
25	C	0.005808	0.145265	0	0.431263	0	0.417457	0.000185246	0	2.17936e-05	0	0	0.005808	0.14508	0	0.000185246	0	0.0549417	0.346889	0.0289201	0.00051215	0	0	1.08968e-05	0.00559006	0.000337801	0	0.411518	0.000185246	0	2.17936e-05	0	0	0.000217936	0.00521957	0.000326904	0	4.35872e-05	0	0.14508	0	0.000185246	0	0	2.17936e-05	0.0549199	0.346889	0.0289201	0.00051215
26	C	0.389475	0.172125	0	0.297104	2.91392e-05	0.0878548	0.000495367	0	0	0.0529168	0	0.389475	0.172125	0	0	0	0.0682149	0.193601	0.000699341	0.0345883	0	2.91392e-05	0	0.00116557	0.00136954	0	0.0853197	0.000495367	0	0	0.0529168	0	0.000466228	0.346757	0.0415525	0	0.000699341	0	0.172125	0	0	0	0	5.82785e-05	0.0681567	0.193601	0.000699341	0.0345883
27	C	0.0447896	0.535746	5.01002e-05	0.36498	0.0001002	0.0533066	0.001002	0	0	2.50501e-05	0	0.0447896	0.535746	0	0	5.01002e-05	0.0106713	0.311247	0.0101703	0.0328908	0	0.0001002	0	0.00601202	0.00994489	0	0.0373497	0.001002	0	0	2.50501e-05	0	0.00240481	0.0343186	0.00766533	0	0.000375752	2.50501e-05	0.535746	0	0	0	5.01002e-05	0.000125251	0.0105461	0.311247	0.0101703	0.0328908
28	C	0.0504853	0.255662	0	0.648629	0	0.0450101	0.000106659	0	0	0.000106659	0	0.0504853	0.255626	0	3.5553e-05	0	0.00167099	0.63583	0.00597291	0.00515519	0	0	0	0.00152878	0.00167099	0	0.0418104	0.000106659	0	0	0.000106659	0	7.11061e-05	0.0349131	0.01543	3.5553e-05	3.5553e-05	0	0.255626	0	3.5553e-05	0	0	0.000106659	0.00156433	0.63583	0.00597291	0.00515519
29	C	0.00329722	0.433711	3.62332e-05	0.531287	0.000543498	0.0306895	0.000253632	0.000144933	0	3.62332e-05	0	0.00329722	0.433639	0	7.24664e-05	3.62332e-05	0.00300736	0.219247	0.00728287	0.30175	0	0.000543498	0	0.0132614	0.00224646	0	0.0151817	0.000253632	0.000144933	0	3.62332e-05	0	0.000144933	0.00166673	0.00137686	0	0.0001087	0	0.433639	0	7.24664e-05	0	3.62332e-05	3.62332e-05	0.00297112	0.219247	0.00728287	0.30175
30	C	0.015742	0.447372	0	0.530059	0	0.00659508	0.000198847	0	0	0	3.31411e-05	0.015742	0.447339	0	3.31411e-05	0	0.0334725	0.390203	0.0128256	0.0935574	0	0	0	0.00248558	0.00059654	0	0.00351296	0.000198847	0	0	0	3.31411e-05	0.000165706	0.0145821	0.00089481	0	9.94233e-05	0	0.447339	0	3.31411e-05	0	0	0	0.0334725	0.390203	0.0128256	0.0935574
31	C	0.00352636	0.708186	0.000116574	0.219713	0	0.0680209	0	2.91435e-05	0.000408009	0	0	0.00352636	0.708186	0	0	0.000116574	0.00262291	0.210882	0.00271034	0.00349722	0	0	2.91435e-05	0.000641156	2.91435e-05	0	0.0673214	0	2.91435e-05	0.000408009	0	0	0	0.000262291	0.0031475	0	0.000116574	0	0.708186	0	0	0	0.000116574	2.91435e-05	0.00259377	0.210882	0.00271034	0.00349722
32	C	0.00426876	0.134516	0	0.686027	0.000974757	0.173944	3.36123e-05	0	0	0	0.000235286	0.00426876	0.134516	0	0	0	0.00141172	0.675641	0.00749555	0.00147894	0	0.000974757	0.000201674	0.00144533	0.00168062	0	0.170616	3.36123e-05	0	0	0	0.000235286	0	0	0.00420154	6.72246e-05	0	0	0.134516	0	0	0	0	0	0.00141172	0.675641	0.00749555	0.00147894
33	C	0.00384806	0.310964	0	0.672536	0	0.0120398	0.000408128	2.9152e-05	0.000174912	0	0	0.00384806	0.310964	0	0	0	0.0116025	0.594088	0.00338163	0.0634638	0	0	0	0.00043728	0.000116608	0	0.0114859	0.000408128	2.9152e-05	0.000174912	0	0	8.74559e-05	0.00306096	0.000641343	0	5.83039e-05	0	0.310964	0	0	0	0	5.83039e-05	0.0115442	0.594088	0.00338163	0.0634638
34	C	0.0175166	0.00430424	0	0.575052	8.17261e-05	0.398878	0.00367767	0	0	0.000435872	5.4484e-05	0.0175166	0.00430424	0	0	0	0.0137027	0.53378	0.0274872	8.17261e-05	0	8.17261e-05	5.4484e-05	8.17261e-05	0	0	0.398741	0.00367767	0	0	0.000435872	5.4484e-05	0.000626566	8.17261e-05	0.0163452	5.4484e-05	0.00040863	0	0.00430424	0	0	0	0	0.000572082	0.0131307	0.53378	0.0274872	8.17261e-05
35	C	0.0272394	0.637231	0.000284282	0.300382	0.0159198	0.0177288	0.000723626	0	0	0.000439345	5.16876e-05	0.0272394	0.637231	0	0	0.000284282	0.001654	0.285264	0.00131803	0.0121466	0	0.0159198	0	0.00126635	0.00129219	0	0.0151703	0.000723626	0	0	0.000439345	5.16876e-05	0.000155063	0.00961389	0.0172637	0.000155063	5.16876e-05	0	0.637231	0	0	0	0.000284282	0.000180907	0.0014731	0.285264	0.00131803	0.0121466
36	C	0.0410321	0.348647	0	0.572215	0.00129012	0.0362807	0.000534928	0	0	0	0	0.0410321	0.348647	0	0	0	0.00339836	0.51416	0.0267778	0.0278792	0	0.00129012	0	0.00198238	0.00755192	0	0.0267464	0.000534928	0	0	0	0	0.000503461	0.000188798	0.0402454	3.14663e-05	3.14663e-05	3.14663e-05	0.348647	0	0	0	0	9.4399e-05	0.00330396	0.51416	0.0267778	0.0278792
37	C	0.0126204	0.293335	0	0.365117	0.00836054	0.320169	0	0	0	0.000398121	0	0.0126204	0.293335	0	0	0	0.00728561	0.280476	0.0142925	0.0630623	0	0.00836054	0	0.000477745	0	0	0.319691	0	0	0	0.000398121	0	0.000159248	0.0119038	0.000477745	0	7.96242e-05	0	0.293335	0	0	0	0	7.96242e-05	0.00720599	0.280476	0.0142925	0.0630623
38	C	0.0159746	0.00991443	0	0.331855	9.69626e-05	0.637384	0.00475117	0	0	2.42407e-05	0	0.0159746	0.00991443	0	0	0	0.0121446	0.29033	0.0277798	0.0015514	4.84813e-05	9.69626e-05	0	4.84813e-05	0.000145444	0	0.63719	0.00475117	0	0	2.42407e-05	0	0.00215742	0.00576928	0.00799942	2.42407e-05	2.42407e-05	0	0.00991443	0	0	0	0	0.000266647	0.0118779	0.29033	0.0277798	0.0015514
39	C	0.110486	0.0160314	2.37501e-05	0.787389	0	0.0836955	0.00102126	0	0	0.00135376	0	0.110486	0.0160314	0	0	2.37501e-05	0.0084788	0.710129	0.0678067	0.000973756	0	0	0	7.12504e-05	4.75003e-05	0	0.0835768	0.00102126	0	0	0.00135376	0	0.000783755	0.0117801	0.0978506	0	2.37501e-05	4.75003e-05	0.0160314	0	0	0	2.37501e-05	4.75003e-05	0.0084313	0.710129	0.0678067	0.000973756
40	C	0.258353	0.0353089	0	0.693571	0	0.00774552	0.000347213	0	0.00459389	8.01261e-05	0	0.258353	0.0353089	0	0	0	0.413664	0.267167	0.00240378	0.0103363	0	0	0	0.000106835	5.34174e-05	0	0.00758527	0.000347213	0	0.00459389	8.01261e-05	0	0.000186961	0.22649	0.0314628	0	0.00021367	0	0.0353089	0	0	0	0	0	0.413664	0.267167	0.00240378	0.0103363
41	A	0.00722984	0.295764	0	0.458614	8.24697e-05	0.236001	0.000467328	0	0.00184182	0	0	0.00722984	0.295764	0	0	0	0.00503065	0.439454	0.0089892	0.00514061	0	8.24697e-05	0	0.0596256	0.00764219	2.74899e-05	0.168706	0.000467328	0	0.00184182	0	0	0.000219919	0.00104462	0.00591033	0	5.49798e-05	0	0.295764	0	0	0	0	2.74899e-05	0.00500316	0.439454	0.0089892	0.00514061
42	A	0.112686	0.0743582	0	0.733222	0.000106811	0.033503	8.90092e-05	0.000142415	0	0.0458931	0	0.112686	0.0743582	0	0	0	0.21056	0.515844	0.00110371	0.00571439	0	0.000106811	0	0.00621284	0.00283049	0	0.0244597	8.90092e-05	0.000142415	0	0.0458931	0	0.00108591	0.107665	0.00356037	0.000249226	0.000106811	1.78018e-05	0.0743582	0	0	0	0	0	0.21056	0.515844	0.00110371	0.00571439
43	A	0.00533908	0.239695	3.3162e-05	0.442481	0	0.304228	0.000364782	0	0.00785939	0	0	0.00533908	0.239695	0	0	3.3162e-05	0.0820759	0.35102	0.00378047	0.00560438	0	0	0	0.0013928	0.013298	0	0.289537	0.000364782	0	0.00785939	0	0	0.000298458	0.00242083	0.0026198	0	0	0	0.239695	0	0	0	3.3162e-05	3.3162e-05	0.0820428	0.35102	0.00378047	0.00560438
44	A	0.0934471	0.0430219	0	0.178748	0	0.684664	5.94636e-05	5.94636e-05	0	0	0	0.0934471	0.0430219	0	0	0	0.0196825	0.154487	0.00184337	0.00273533	0	0	0	8.91955e-05	0.00178391	0	0.682791	5.94636e-05	5.94636e-05	0	0	0	0.000118927	0.0006541	0.0926741	0	0	0	0.0430219	0	0	0	0	0	0.0196825	0.154487	0.00184337	0.00273533
45	A	0.00890119	0.136612	0	0.67687	2.71378e-05	0.176938	0.000162827	8.14133e-05	0	0.000407067	0	0.00890119	0.136612	0	0	0	0.00352791	0.652094	0.0181009	0.00314798	0	2.71378e-05	0	0.0010041	0.00138403	0	0.17455	0.000162827	8.14133e-05	0	0.000407067	0	2.71378e-05	0.00236099	0.00648593	2.71378e-05	0	0	0.136612	0	0	0	0	0.000135689	0.00339222	0.652094	0.0181009	0.00314798
46	A	0.0217407	0.302542	4.68549e-05	0.670634	4.68549e-05	0.00482605	0.000140565	2.34274e-05	0	0	0	0.0217407	0.302542	0	0	4.68549e-05	0.000421694	0.667073	0.00248331	0.000655968	0	4.68549e-05	0	0.00194448	0	0	0.00288157	0.000140565	2.34274e-05	0	0	0	0	0.0163055	0.00538831	0	4.68549e-05	0	0.302542	0	0	0	4.68549e-05	0	0.000421694	0.667073	0.00248331	0.000655968
47	A	0.0159285	0.0976343	0	0.643628	0	0.108999	0.000297239	0.00215061	0	0.131362	0	0.0159285	0.0976343	0	0	0	0.00468589	0.610057	0.00374172	0.0251429	0	0	0	0.0207543	0.0127988	0	0.0754463	0.000297239	0.00215061	0	0.131362	0	3.49693e-05	1.74847e-05	0.0158236	3.49693e-05	1.74847e-05	0	0.0976343	0	0	0	0	6.99386e-05	0.00461595	0.610057	0.00374172	0.0251429
48	A	0.0213097	0.318033	8.63906e-05	0.529546	0.000287969	0.126188	0.0045499	0	0	0	0	0.0213097	0.318033	0	0	8.63906e-05	0.0314462	0.362754	0.00855267	0.126793	0	0.000287969	0	0.000691125	0.0102805	0	0.115216	0.0045499	0	0	0	0	0.000374359	0.016875	0.00403156	2.87969e-05	0	0	0.318033	0	0	0	8.63906e-05	0.00046075	0.0309854	0.362754	0.00855267	0.126793
49	A	0.0405087	0.0300963	0	0.458861	0	0.468561	0.000380364	0.001569	2.37727e-05	0	0	0.0405087	0.0300963	0	0	0	0.00763105	0.44203	0.00774991	0.00145014	0	0	0	0.00660882	0.00259123	0	0.459361	0.000380364	0.001569	2.37727e-05	0	0	0.00121241	0.000190182	0.0390111	0	7.13182e-05	2.37727e-05	0.0300963	0	0	0	0	2.37727e-05	0.00760727	0.44203	0.00774991	0.00145014
50	A	0.0765039	0.0666883	0.000324781	0.840208	0	0.0029952	0.000144347	0.000288694	0.0117282	0	0.00111869	0.0765039	0.0666161	0	7.21735e-05	0.000324781	0.0414637	0.59074	0.197575	0.0104291	0	0	0	0.000396954	0	0	0.00259825	0.000144347	0.000288694	0.0117282	0	0.00111869	0.00122695	0.00010826	0.0741944	0.000866082	0.00010826	0	0.0666161	0	7.21735e-05	0.000324781	0	0.00010826	0.0413554	0.59074	0.197575	0.0104291
51	A	0.0292888	0.151137	0	0.809289	0	0.00638609	2.56469e-05	0	0.00176964	0.00210305	0	0.0292888	0.151137	0	0	0	0.00120541	0.763407	0.00615527	0.0385217	0	0	0	0.000487292	0.00256469	0	0.0033341	2.56469e-05	0	0.00176964	0.00210305	0	5.12939e-05	0.0122849	0.0169526	0	0	0	0.151137	0	0	0	0	7.69408e-05	0.00112847	0.763407	0.00615527	0.0385217
52	A	0.0128344	0.0879757	8.35213e-05	0.535483	0.000194883	0.361146	0.00175395	0	0.000361925	0.000167043	0	0.0128344	0.0879757	0	0	8.35213e-05	0.333138	0.171469	0.00236644	0.0285086	0	0.000194883	0	0.000445447	0.00111362	5.56808e-05	0.359531	0.00175395	0	0.000361925	0.000167043	0	0.00105794	0.00609705	0.00531752	0.000222723	0.000139202	0	0.0879757	0	0	0	8.35213e-05	5.56808e-05	0.333083	0.171469	0.00236644	0.0285086
53	A	0.017838	0.311939	4.76315e-05	0.635119	0	0.0332706	0.000928815	0	0.000857367	0	0	0.017838	0.311939	0	0	4.76315e-05	0.0322465	0.576437	0.0224344	0.00400105	0	0	9.5263e-05	0.00183381	0.00895473	0	0.0223868	0.000928815	0	0.000857367	0	0	0.000714473	0.00107171	0.0157898	0.000119079	0.000142895	0	0.311939	0	0	0	4.76315e-05	2.38158e-05	0.0322227	0.576437	0.0224344	0.00400105
54	A	0.00259854	0.579016	0	0.400653	0	0.0176077	0.00012473	0	0	0	0	0.00259854	0.579016	0	0	0	0.00108099	0.387411	0.00440712	0.00775403	0	0	0	0.000686014	0.00446948	0	0.0124522	0.00012473	0	0	0	0	0.00024946	0.00108099	0.0012473	0	2.07883e-05	0	0.579016	0	0	0	0	4.15766e-05	0.00103941	0.387411	0.00440712	0.00775403
55	A	0.0941051	0.193916	0	0.523353	0	0.1774	0.000323385	0.00293357	0.00796914	0	0	0.0941051	0.193916	0	0	0	0.115194	0.358935	0.0189411	0.0302827	0	0	0	0.00161693	0.00552065	0	0.170262	0.000323385	0.00293357	0.00796914	0	0	9.23958e-05	0.0778435	0.0161693	0	0	0	0.193916	0	0	0	0	0	0.115194	0.358935	0.0189411	0.0302827
56	A	0.00582019	0.058099	0	0.481048	0	0.443922	8.81847e-05	0.00912712	0.000661385	0.00123459	0	0.00582019	0.058099	0	0	0	0.195858	0.266803	0.00069078	0.0176957	0	0	0	0.000220462	0.00377725	0	0.439924	8.81847e-05	0.00912712	0.000661385	0.00123459	0	0.000338041	0.00152854	0.00361557	2.93949e-05	0.000308647	0	0.058099	0	0	0	0	4.40924e-05	0.195814	0.266803	0.00069078	0.0176957
57	A	0.0076219	0.0428108	1.78082e-05	0.464099	0	0.476707	0.00854792	0.00019589	0	0	0	0.0076219	0.0428108	0	0	1.78082e-05	0.00560957	0.276686	0.120027	0.0617765	0	0	0	8.90409e-05	0.0167041	0	0.459914	0.00854792	0.00019589	0	0	0	0.000890409	0.000712327	0.00560957	7.12327e-05	0.000338355	0	0.0428108	0	0	0	1.78082e-05	0.000231506	0.00537807	0.276686	0.120027	0.0617765
58	A	0.00474796	0.30127	0	0.263806	0	0.429777	3.46566e-05	0	0.000329238	3.46566e-05	0	0.00474796	0.30127	0	0	0	0.0166179	0.231056	0.00154222	0.0145904	0	0	0	0.000259925	0.00325772	0	0.426259	3.46566e-05	0	0.000329238	3.46566e-05	0	3.46566e-05	0	0.00467865	1.73283e-05	1.73283e-05	0	0.30127	0	0	0	0	0	0.0166179	0.231056	0.00154222	0.0145904
59	A	0.000775722	0.0266801	0	0.120778	0	0.807151	4.70135e-05	0	0	0.0445688	0	0.000775722	0.0266801	0	0	0	0.00258574	0.0888084	0.00324393	0.0261395	0	0	0	0.00253873	0	0	0.804612	4.70135e-05	0	0	0.0445688	0	4.70135e-05	0.000587668	9.40269e-05	2.35067e-05	2.35067e-05	0	0.0266801	0	0	0	0	0	0.00258574	0.0888084	0.00324393	0.0261395
60	A	0.0305356	0.0407998	1.97769e-05	0.844731	0.000494423	0.0144371	0.000791077	0.0168895	0	0.0513013	0	0.0305356	0.0407998	0	0	1.97769e-05	0.00480579	0.811407	0.00880073	0.0197176	0	0.000494423	1.97769e-05	0.0007713	0.00280832	0	0.0108378	0.000791077	0.0168895	0	0.0513013	0	0.000158215	0.000217546	0.029962	0.000138438	1.97769e-05	3.95538e-05	0.0407998	0	0	0	1.97769e-05	5.93307e-05	0.00474646	0.811407	0.00880073	0.0197176
61	A	0.00206389	0.689274	0	0.229377	0.0015241	0.0776338	0.000127008	0	0	0	0	0.00206389	0.689274	0	0	0	0.0130501	0.180352	0.00406427	0.0318473	6.35042e-05	0.0015241	0	0.00215914	6.35042e-05	0	0.0754112	0.000127008	0	0	0	0	0	3.17521e-05	0.00203213	0	0	0	0.689274	0	0	0	0	0	0.0130501	0.180352	0.00406427	0.0318473
[truncated: 866 more columns]
