# Supplementary material for: APOE-ε4 Carrier Status and Gut Microbiota Dysbiosis in Patients With Alzheimer Disease
Source: Front Neurosci. 2021 Feb 24;15:619051. doi: 10.3389/fnins.2021.619051 (PMC7959830; doi:10.3389/fnins.2021.619051)
Supplement: Supplementary Table 1 — Primer information. [file Table_1.XLSX]

## Sheet: Sheet1
		5'-3'
rs744373 (A-G)	PF	5'-CAGCCTCCACTGCAAATTAGG-3'
	PR	5'-CTGGAGAAGTCCTGGTCTGAAAG-3'
	Probe-G	5'-FAM-AGGTCTGAGGCCCT-MGB-3'
	Probe-A	5'-HEX-AGGTCTGAGGCTCT-MGB-3'
rs9331888 (C-G)	PF	5'-GGCCTGGCAGAGCAAGAG-3'
	PR	5'-GGACAATTCCCTTCGGAGAGT-3'
	Probe-C	5'-FAM-TCCTTCCAAACGGAC-MGB-3'
	Probe-G	5'-HEX-TCCTTCCAAAGGGACT-MGB-3'
rs670139 (G-T)	PF	5'-TGAAGGATCAGACCCTAGCAAAA-3'
	PR	5'-AGTTAATCATCTTCCCTTGCCTTTATAT-3'
	Probe-T	5'-FAM-AGTCAAAGTTTACATCAAGT-MGB-3'
	Probe-G	5'-HEX-AAGTTTACCTCAAGTTGG-MGB-3'
rs3764650 (T-G)	PF	5'-TGCCCTATCCGTGCTATGTG-3'
	PR	5'-AGAGTCCCCTGCTCCTCCC-3'
	Probe-T	5'-HEX-CACCTTTACACCACTCC-MGB-3'
	Probe-G	5'-FAM-CACCGTTACACCACTC-MGB-3'
rs3865444(C-A)	PF	5'-TCTGCCCCAGACACTCACA-3'
	PR	5'-CGAGTCGCAGCCTCACCT-3'
	Probe-G	5'-FAM-CACCCCATGGATCT-MGB-3'
	Probe-T	5'-HEX-ACACCCAATGGATCT-MGB-3'
rs9349407(G-C)	PF	5'-ATGTAGTTAGCTTTAGTGTATGGTG-3'
	PR	5'-GTGAGTCAGTGAGTGGTGAGC-3'
	Probe-C	5'-FAM-ACTAATCTCCTAGGCCTT-MGB-3'
	Probe-G	5'-HEX-CTAATGTCCTAGGCCTT-MGB-3'
rs11771145(G-A)	PF	5'-AGATGTTAGCAAACACCTCACTT-3'
	PR	5'-CCACACACAACCAAGGAATAC-3'
rs3818361 (A-G)	PF	5'-CACAGACAAGGTGTTGGAGAG-3'
	PR	5'-GACAGTTCCAGAGCACTTGTTA-3'
rs6656401 (A-G)	PF	5'-GCTGGCAATCGTTGATGTTC-3'
	PR	5'-AGACAGAAGAGCAAAGGACAC-3'
rs3851179 (T-C)	PF	5'-TCAGTGTCAGCAGTCAACACAC-3'
	PR	5'-CAGCTTGGGCGAATTACTAAAC-3'
APOE	PF	5'-ACTGTGCGACACCCTCCCGCCCTC-3'
	PR	5'-TCCGCCACCTGCTCCTTCACCTCG-3'
